# Supplementary material for: Publishing where it matters
Source: Oxford University Press journal article supplement (doi:10.1242/jcs.260914), 2023-01-15
Supplement: jcs260914supp.pdf [file jcs260914supp.pdf]

Thank you to everyone listed below who served as reviewers and co-reviewers for Journal of Cell Science during 2022.

|                            |                       |                          |
|----------------------------|-----------------------|--------------------------|
| Hagai Abeliovich           | Mark Ashe             | Renata Basto             |
| Charles Abrams             | Mohammad Asim         | Sujit Basu               |
| Alexandra Abramsson        | Attila Aszodi         | Buzz Baum                |
| Ariane Abrieu              | Philip Auckland       | Oliver Bell              |
| Sabrina Absalon            | Timothy Audas         | Inna Belyantseva         |
| Manu Ahmed                 | Jotham Austin         | Lorena Benedetti         |
| Makoto Akashi              | Oshri Avraham         | Alexandre Benmerah       |
| Anna Akhmanova             | Gamze Ayaz            | Abesh Bera               |
| Takuya Akiyama             | Kathryn Ayscough      | Andreas Bergmann         |
| Urs Albrecht               | Peter Baas            | Alex Beristain           |
| Dario Alessi               | Markus Babst          | Bruno Bernardes de Jesus |
| Stephen Alexander          | Adekunle Bademosi     | Viviana Berthoud         |
| Viki Allan                 | Shirin Bahmanyar      | Anne Bertolotti          |
| Leonardo Almeida-Souza     | Mohan Balasubramanian | Sebastien Besteiro       |
| Jordi Altirriba            | Tamas Balla           | Luis Bezares-Calderon    |
| Daniel Altschuler          | Christoph Ballestrem  | Vrushank Bhatt           |
| Christophe Ampe            | Mamata Bangera        | Suvendra Bhattacharyya   |
| Kurt Amsler                | Sudeep Banjade        | Erfei Bi                 |
| Vaishnavi Ananthanarayanan | Shilai Bao            | Pengpeng Bi              |
| Emma Andersson             | David Barford         | Christine Biben          |
| Deborah Andrew             | Nick Barker           | Nicolas Bidere           |
| Norma Andrews              | Sami Barmada          | Maarten Bijlsma          |
| Wolfram Antonin            | Martin Baron          | Marcus Bischoff          |
| Mineyoshi Aoyama           | Maureen Barr          | Gerd Blobel              |
| Yoav Arava                 | Yves Barral           | Graciela Boccaccio       |
| Vincent Archambault        | Vincenzo Barrese      | Fabian Bock              |
| Thomas Arnesen             | Guillermo Barreto     | Satish Bodakuntla        |
| Joaquin Arribas            | Peter Barr-Gillespie  | Ursula Bommhardt         |
| Yvan Arsenijevic           | David Barry           | Gaëlle Boncompain        |
| Melis Dilara Arslanhan     | Angela Barth          | Jean-Paul Borg           |
| Atsushi Asakura            | Arash Bashirullah     | Karim Bouazoune          |
|                            | Philippe Bastin       | Laura Boulan             |

|                            |                                |                       |
|----------------------------|--------------------------------|-----------------------|
| Etienne Boulter            | James Casanova                 | Yuh Min Chook         |
| Maxine Boutry              | Jason Casler                   | Jenna Christensen     |
| Marcus Braun               | Elisabetta Ada Cavalcanti-Adam | Magdalena Chrzanowska |
| Jose Javier Bravo-Cordero  | Valeria Cavalli                | Beth Cimini           |
| David Breslow              | Ignacio Cebrian                | Sandra Citi           |
| Joanna Bridger             | Francesco Cecconi              | Lena Claesson-Welsh   |
| William Briehar            | Rachel Ceron                   | Peter Claus           |
| Thomas Bromberger          | Paramita Chakrabarty           | Joseph Cleary         |
| Jason Bruce                | Luke Chamberlain               | Alisa Clyne           |
| Franz Bruckert             | Danny Chan                     | Lucio Cocco           |
| David Bryant               | Nei-Li Chan                    | Shamshad Cockcroft    |
| Ross Buchan                | Chi-Lun Chang                  | Henry Cohen           |
| Belinda Bullard            | Ching Fang Chang               | Hilary Coller         |
| Samuel Bunting             | Fred Chang                     | Mark Collins          |
| Emanuele Buratti           | Nikolaos Charmpilas            | Elizabeth Conibear    |
| Katja Burk                 | Gilles Charvin                 | Barbara Conradt       |
| James Burrows              | Saurabh Chattopadhyay          | Daniel Conway         |
| Veronica Burzio            | Anoop Chauhan                  | Tiffany Cook          |
| Folma Buss                 | Philippe Chavier               | Daniel Coombs         |
| Birol Cabukusta            | Meenakshi Chellaiah            | Emmanuelle Cordat     |
| David Calderwood           | Jianguo Chen                   | Julia Cordero         |
| Yolanda Calle              | Jichao Chen                    | Mark Corkins          |
| Nadine Camougrand          | Qian Chen                      | Joana Correia Faria   |
| Rita Canipari              | Xi Chen                        | Frank Costantini      |
| Julie Canman               | Xing-Zhen Chen                 | Pierre Coulombe       |
| Michael Caplan             | Yu Chen                        | Laurent Counillon     |
| Steven Cappell             | Yu Chen                        | Michael Cousin        |
| Jeremy Carlton             | Hong Cheng                     | Christoph Cremer      |
| Ana Carmena                | Pragati Chenguppa              | Thomas Cremer         |
| Amancio Carnero            | Colbie Chinowsky               | Ottavio Cremona       |
| Paula Carpintero Fernandez | Hyeseong Cho                   | Richard Cripps        |
| Kermit Carraway            | Heejun Choi                    | Christine Crish       |
| Vern Carruthers            | Kwang-Wook Choi                | Colin Crist           |

|                     |                         |                            |
|---------------------|-------------------------|----------------------------|
| Paul Cullen         | Katinka Döhner          | Jan Faix                   |
| Peter Cullen        | Lee Dolat               | Matthias Falk              |
| Brian Cunniff       | Roberto Dominguez       | Xiangyu Fan                |
| Cynthia Damer       | Viji Draviam            | Xiaoming Fang              |
| Erik Danen          | Hauke Drechsler         | Marisa Faraldo             |
| Peter Daniel        | Iain Drummond           | Hesso Farhan               |
| David Danielpour    | Crislyn D'Souza-Schorey | Matthias Feige             |
| Maitreyi Das        | Adi Dubash              | Michael Feldbrügge         |
| Swapneeta Date      | Luca Ducoli             | Daniel Feliciano           |
| Avais Daulat        | Angela Dulhunty         | Jessie Fernandez           |
| Pier Paolo D'Avino  | Elizabeth Duncan        | Rodrigo Fernandez-Gonzalez |
| Sergio de Almeida   | Mara Duncan             | Nuria Ferrandiz            |
| Marc de la Roche    | Sirio Dupont            | Joao Ferreira              |
| Samuel Dean         | Mona Dvir-Ginzberg      | Sébastien Ferreira-Cerca   |
| Abhijit Deb Roy     | Jeffrey Dvorin          | James Ferrell              |
| Thomas Dechat       | Martin Egan             | Michael Fessing            |
| Nathalie Delgehyr   | Jonathan Eggenschwiler  | Mark Field                 |
| Qing Deng           | Tobias Eisenberg        | Ana Figueiredo             |
| Ruhee Dere          | Natalie Elia            | Jorge Filmus               |
| Emmanuel Derivery   | Shane Elliott           | Elif Firat-Karalar         |
| Carmen Dessauer     | John Elrod              | Robert Fischer             |
| Danelle Devenport   | Akinori Endo            | Greg FitzHarris            |
| Michael Devine      | Adam Engler             | Edward Fon                 |
| Gautam Dey          | Johanna Englund         | Paul Forscher              |
| Suman Dhar          | Ralf Erdmann            | Theodore Fotsis            |
| Herschel Dhekne     | Fumiko Esashi           | Anne Fourest-Lieuvin       |
| Gianni Di Guglielmo | Ricardo Escalante       | Velia M Fowler             |
| Simone Di Paola     | Peter Espenshade        | Don Fox                    |
| Caleb Dillingham    | Isabel Espinosa         | Margaret Frame             |
| Dennis Discher      | Noemi Esteras           | Claudio Franco             |
| Roberto Docampo     | Andrew Ewald            | Jeffrey Fredberg           |
| Mark Dodding        | Helge Ewers             | Peter Friedl               |
| Jürgen Dohmen       | Kenneth Fahy            | Jonathan Friedman          |

|                               |                         |                       |
|-------------------------------|-------------------------|-----------------------|
| Tom Friedman                  | Jonathan Gilthorpe      | Ulrike Gruneberg      |
| Florian Frohlich              | Mathieu Gissot          | Oliver Gruss          |
| Andrew Fry                    | Amy Gladfelter          | Giulia Guarguaglini   |
| Dan Fu                        | Christina Gladkova      | Marc-Jan Gubbels      |
| Xiang-Dong Fu                 | Pierre-Emmanuel Gleizes | Taran Gujral          |
| Morihisa Fujita               | Bojana Gligorijevic     | Gregg Gundersen       |
| Judith Fulle                  | Martijn Gloerich        | Peter Gunning         |
| Hironori Funabiki             | Michael Glotzer         | Ankit Gupta           |
| Clare Futter                  | Joachim Goedhart        | Mohan Gupta           |
| Koncz Gábor                   | Mehmet Oguz Gok         | Maximiliano Gutierrez |
| Sudarshan Gadadhar            | Richard Gomer           | Robert Haase          |
| Peter Galie                   | Edgar Gomes             | Rania Hadjisavva      |
| Thierry Galli                 | Francisco Gomez         | Iain Hagan            |
| Jennifer Gamble               | Pierre Gönczy           | Nils Halberg          |
| Laura Gammill                 | Cayetano Gonzalez       | Julia Halford         |
| Iniyana Ganesan               | Ayelén González Montoro | John Hammer           |
| Subba Rao Gangi Setty         | Gohta Goshima           | William Hancock       |
| Sushila Ganguli               | Hidemasa Goto           | Dorit Hanein          |
| Antonio Garcia de<br>Herreros | Yuhei Goto              | Kieran Harvey         |
| Rafael Garcia-Mata            | Cara Gottardi           | Riko Hatakeyama       |
| Margaret Gardel               | Gwyn Gould              | Tomoyuki Hatano       |
| Zev Gartner                   | Kathleen Gould          | Nancy Hawkins         |
| Reto Gassmann                 | Ben Goult               | Richard Hayward       |
| Stephen Gee                   | Christos Gournas        | Fenglei He            |
| Jonathan Geiger               | Swetha Gowrishankar     | Mu He                 |
| Anja Geitmann                 | Todd Graham             | Xiangwei He           |
| Arne Gennerich                | Carsten Grashoff        | Richard Heads         |
| Fanni Gergely                 | Eloïse Grasset          | Aoife Heaslip         |
| Christoph Gerhardt            | Tim Graubert            | Michael Hebert        |
| Kamryn Gerner-Mauro           | Christopher Grefen      | Dominique Helmlinger  |
| Sabrina Ghadaouia             | Giovanna Grimaldi       | Jana Helsen           |
| Levi Gheber                   | Sergio Grinstein        | Adam Hendricks        |
| Carmela Giglione              | Robert Grosse           | Mike Henne            |

|                     |                        |                      |
|---------------------|------------------------|----------------------|
| Clarissa Henry      | Jae Yeon Hwang         | Marlieke Jongsma     |
| Roberto Hernandez   | Consuelo Ibar          | Emily Joo            |
| Johannes Herrmann   | Nikolaos Ignatiadis    | Philip Jordan        |
| Ellen Hertz         | Miho Iijima            | Jomon Joseph         |
| Ewald Hettema       | Koji Ikegami           | Richard Kahn         |
| Jonathan Higgins    | Junichi Ikenouchi      | Yoshiaki Kamada      |
| Henry Higgs         | Toru Imamura           | Pakorn Kanachanawong |
| Blake Hill          | Takanari Inoue         | Tomotake Kanki       |
| Kent Hill           | Robert Insall          | Lukas Kapitein       |
| Shin-ichiro Hiraga  | Maria Ioannou          | Subhradip Karmakar   |
| Nobutaka Hirokawa   | Eddie Ip               | Anna Kashina         |
| Koret Hirschberg    | M. Luisa Iruela-Arispe | Paul Kaufman         |
| Helfrid Hochegger   | Kenneth Irvine         | Randal Kaufman       |
| Mark Hochstrasser   | Thomas Iskratsch       | Rob Kay              |
| Adam Hoppe          | Susumu Itoh            | Annika Keller        |
| Thorsten Hoppe      | Pavel Ivanov           | Alexander Kelly      |
| Jonathon Howard     | Johanna Ivaska         | Anne Kenworthy       |
| Alan Howe           | Catherine Jackson      | Nicoletta Kessarlis  |
| Sigrid Hoyer-Fender | Jonathan Jackson       | Jayati Khanna        |
| Kaiyao Huang        | Ralf Jacob             | Saadi Khochbin       |
| Linda Huang         | Paul Janmey            | Anthony Khong        |
| Sheng-Fu Huang      | Gert Jansen            | Richard Killick      |
| Xi Huang            | Jane Jardine           | Jaehoon Kim          |
| Otmar Huber         | Antoine Jegou          | Peter Kim            |
| Sarah Hughes        | Lin-Hua Jiang          | Tae-Hee Kim          |
| Frederick Hughson   | Yuyang Jiang           | Yuu Kimata           |
| Stephen Huisman     | Juan Jimenez           | Akatsuki Kimura      |
| Sandrine Humbert    | Tian Jin               | Jason King           |
| Berthold Huppertz   | Zi-Bing Jin            | Michael King         |
| Stefan Huttelmaier  | Holly Jiogo            | Yulia Kiyan          |
| Stephan Huvneers    | Lukasz Joachimiak      | Judith Klumperman    |
| Jean-René Huynh     | Colin Johnson          | Toshihide Kobayashi  |
| Eun Mi Hwang        | Mohit Kumar Jolly      | Jae-Young Koh        |

|                              |                       |                          |
|------------------------------|-----------------------|--------------------------|
| Masaaki Komatsu              | Eric Lecuyer          | Alexis Lomakin           |
| Konstantinos Konstantopoulos | Stephane Lefrancois   | Jadranka Loncarek        |
| Benoît Kornmann              | Tanmay Lele           | Shalini Low-Nam          |
| Evi Kostenis                 | Marius Lemberg        | Lei Lu                   |
| Darius Köster                | Joel Lemiere          | Menghao Lu               |
| Constantinos A Koumenis      | Peter Lenart          | Jens Luders              |
| Levente Kovacs               | Pierre-François Lenne | Andreas Ludwig           |
| Ikuko Koyama-Honda           | Susanne Lens          | Gergely Lukacs           |
| Claudine Kraft               | Paola Lepanto         | Elizabeth Luna           |
| Matthias Krause              | Romain Levayer        | Richard Lundmark         |
| Antonina Kruppa              | Kandice Levental      | Erik Lundquist           |
| Krzysztof Kus                | David Levin           | Huacheng Luo             |
| Johanna Laakkonen            | Lonny Levin           | Vladimir Lupashin        |
| Laura Lackner                | Daniel Lew            | Patrick Lusk             |
| Benoit Ladoux                | Guangpu Li            | Frédéric Luton           |
| Fernanda Laezza              | Hao Li                | G.W. Luxton              |
| Christoffer Lagerholm        | Jianhui Li            | Meisheng Ma              |
| Dale Laird                   | Ming Li               | Karen Maass              |
| Philippe Laissue             | Ping Li               | Chris MacDonald          |
| Becky Lamason                | Xin Liang             | Emma MacDougall          |
| Sarah Lambert                | Wolfgang Liedtke      | Laura Machesky           |
| Jan Lammerding               | Ronald Liem           | Libor Macurek            |
| Jon Lane                     | Daniel Lietha         | Amy Maddox               |
| Thomas Langer                | Grace Lim             | Suzanne Madgwick         |
| Carolyn Larabell             | Iona Lim-Manley       | Kenji Maeda              |
| Patrizia Lavia               | Jialing Lin           | Pascal Maire             |
| Gregory Lavieu               | Sheng-Cai Lin         | Michael Major            |
| Michael Lazarou              | Troy Littleton        | Julija Maldutyte         |
| Matthew Lazzara              | Bo Liu                | Harmeet Malhi            |
| Cynthia Lebeaupin            | Hong Liu              | Pawan Malhotra           |
| Timofei Lebedev              | Wei Liu               | Roop Mallik              |
| Karl Lehtreck                | Viola Lobert          | Jean-Baptiste Manneville |
| Deborah Leckband             | Jeremy Logue          | Aki Manninen             |

|                     |                        |                      |
|---------------------|------------------------|----------------------|
| Philip Mannino      | Yansong Miao           | James Murphy         |
| Uri Manor           | Alphée Michelot        | David Murray         |
| Richard Maraia      | Marco Milan            | Andrea Musacchio     |
| Steven Markus       | Pleasantine Mill       | Dikla Nachmias       |
| Adam Martin         | Elizabeth Miller       | Kazuhiro Nagata      |
| Sophie Martin       | Giacomo Milletti       | Shigekazu Nagata     |
| Maria-Paz Marzolo   | Ismael Mingarro        | Yoshihiro Nakajima   |
| Bayan Mashahreh     | Alexander Minin        | Hiroyasu Nakano      |
| Sam Mathew          | Kate Miroshnikova      | Hitoshi Nakatogawa   |
| Juliette Mathieu    | Masanori Mishima       | Jeremy Nance         |
| Noriyuki Matsuda    | David Mitchell         | Devki Nandan         |
| Satomi Matsuoka     | Kasturi Mitra          | Elisa Närvä          |
| Helen Matthews      | Kota Mizumoto          | Surya Nauli          |
| Nirmala Mavila      | Noboru Mizushima       | Alex Nechiporuk      |
| Maria Dolores Mayán | Alex Mogilner          | Jacques Neefjes      |
| Helen May-Simera    | Jeffrey Moore          | Sarah Neuman         |
| Andrea McClatchey   | Carolyn Moores         | Gabriel Neurohr      |
| Tim McGraw          | Cristina Moreno-Castro | Thanh Nguyen         |
| Richard McIntosh    | Edoardo Moretto        | Christof Niehrs      |
| Tristan McKay       | Norimitsu Morioka      | Carien Niessen       |
| Richard McKenney    | Hideaki Morishita      | Jakob Nilsson        |
| Paula McKeown-Longo | Orson Moritz           | Yiming Niu           |
| Kim McKim           | Yuichi Morozumi        | Jonathon Nixon-Abell |
| James McNew         | Andrea Morrione        | Takeshi Noda         |
| Ohad Medalia        | Ciaran Morrison        | Crystal Noell        |
| Rick Meecker        | James Moseley          | Kelsey Nolden        |
| Lynn Megeney        | Markus Moser           | Luke Noon            |
| Masfique Mehedi     | Deane Mosher           | Sylvie Noordermeer   |
| Dushyant Mehra      | Serge Mostowy          | Noa Novershtern      |
| Dies Meijer         | Aakash Mukhopadhyay    | Ryan O' Shaughnessy  |
| Markus Meissner     | Saikat Mukhopadhyay    | Matthew O'Connell    |
| Thomas Melia        | Cristina Muñoz-Pinedo  | Patrick Oakes        |
| Frederic Meunier    | Shigeo Murata          | Christopher Obara    |

|                      |                            |                       |
|----------------------|----------------------------|-----------------------|
| Philipp Oberdoerffer | Anna-Katharina Pfitzner    | Karine Raymond        |
| Monika Oberer        | Michael Piacentino         | Gina Razidlo          |
| Haruki Ochi          | Jennifer Pinello           | Chiara Recchi         |
| Hiro Ohkura          | Matthias Plessner          | Gregory Redpath       |
| Kazuhiro Oiwa        | Markus Plomann             | Cynthia Reinhart-King |
| Masahiro Oka         | Valeria Poli               | Kunsoo Rhee           |
| Cahir O'Kane         | Panagiotis Politis         | Paulo Ribeiro         |
| Percillia Oliveira   | Vineeth Daniel Poovannalil | Dave Richard          |
| Michael Olson        | Berta Pozzi                | Mark Richards         |
| Felipe Opazo         | Rytis Prekeris             | Alan Richardson       |
| Roger Oria Fernandez | John Presley               | Lina Riegler-Berket   |
| Carolyn Ott          | Claude Prigent             | Anthony Roberts       |
| Raghu Padinjat       | Marcin Przewloka           | Douglas Robinson      |
| Lia Paim             | Elias Puchner              | Phyllis Robinson      |
| Fernando Palhano     | Luigi Puglielli            | Vladimir Rodionov     |
| Qunwen Pan           | Pere Puigserver            | Kelly Rogers          |
| Jae-Bong Park        | Kevin Pumiglia             | Enrique Rojas         |
| John Parrington      | Serapion Pyrpassopoulos    | Karin Romisch         |
| Jan Parys            | Margot Quinlan             | Jeffrey Rosen         |
| Annalisa Pastore     | Daniel Raben               | Carine Rosse          |
| Andrea Pauli         | Jordan Raff                | Robert Rottapel       |
| Ramasamy Paulmurugan | Shaik Rahaman              | Klemens Rottner       |
| Gregory Pazour       | Ann Rajnicek               | Ushasi Roy            |
| Chad Pearson         | Ewa Rajpert De-Meyts       | Stephen Royle         |
| Alexis Peaucelle     | Isha Ralhan                | Carlos Rubbi          |
| Michelle Peckham     | Angelika Rambold           | Eric Rubenstein       |
| Andrew Peden         | C. V. Rao                  | Curzio Ruegg          |
| Lotte Pedersen       | Rajini Rao                 | Manali Rupji          |
| Laurence Pelletier   | Matthew Rasband            | Verena Ruprecht       |
| Pascal Peraldi       | Mark Rasenick              | Tim Ryan              |
| Franck Perez         | Carolyn Rasmussen          | Hyung Don Ryoo        |
| Ryan Petrie          | Tommer Ravid               | Stephan Saalfeld      |
| Suzanne Pfeffer      | Arja Ray                   | Junichi Sadoshima     |



|                      |                         |                        |
|----------------------|-------------------------|------------------------|
| Yasushi Saeki        | Albrecht Schwab         | Andrei Smertenko       |
| Erik Sahai           | Ulrich Schwarz          | James Smyth            |
| Shigeaki Saitoh      | Petra Schwille          | William Snell          |
| Tatsuya Saitoh       | Charles Searles         | Beate Sodeik           |
| Noriyoshi Sakai      | Stephane Sebille        | Sergei Sokol           |
| Yasuyoshi Sakai      | Joachim Seemann         | Thierry Soldati        |
| Kentaro Sakata       | Carina Seidl            | Krishnakant Soni       |
| Karuna Sampath       | Scott Selleck           | Virupakshi Soppina     |
| Michael Samuel       | Daniel Semlow           | Alexander Sorkin       |
| Victoria Sanz-Moreno | Kundan Sengupta         | Monica Sousa           |
| Danuta Sastre        | Jovana Serbanovic-Canic | Anne Spang             |
| Ken Sato             | Raj Sewduth             | Kaitlyn Speckhart      |
| Matthew Savoian      | Erdinc Sezgin           | Sarah Spiegel          |
| Hitoshi Sawa         | Amit Sharma             | Elias Spiliotis        |
| Chiara Scaramuzzino  | Hayley Sharpe           | Elena Spina            |
| P. Schaap            | Yaron Shav-Tal          | Donald Spratt          |
| Andrew Schaefer      | Tatyana Shelkownikova   | Rupa Sridharan         |
| Eyal Schejter        | Yidong Shen             | Saurabh Srivastav      |
| Cara Schiavon        | David Sherwood          | Daniel St Johnston     |
| Elmar Schiebel       | Shu-Hsien Sheu          | Jonathan Stahl-Meyer   |
| Karen Schindler      | Gleb Shtengel           | David Stanek           |
| David Schlaepfer     | Ellen Sidransky         | Alexander Staruschenko |
| Wolfgang Schliebs    | Peter Siegel            | Olivia Steele-Mortimer |
| Walter Schmidt       | Birgit Singer-Krüger    | Joan Steffan           |
| Arp Schnittger       | Harpreet Singh          | Samantha Stehbens      |
| Michael Schnoor      | Andrew Singson          | Harald Stenmark        |
| Frank Schnorrer      | Roberto Sitia           | David Stern            |
| Steffen Scholpp      | Sanjeevi Sivasankar     | Ursula Stochaj         |
| Holger Scholz        | Michael Sixt            | Andrew Stoker          |
| Michael Schrader     | Elin Sjoberg            | Theresia Stradal       |
| Michael Schubert     | Jan Skotheim            | Hilmar Strickf         |
| Maya Schuldiner      | Paris Skourides         | Todd Stukenberg        |
| Bernd Schuttengruber | James Sleight           | Deepa Subramanyam      |

|                                     |                      |                        |
|-------------------------------------|----------------------|------------------------|
| Shiro Suetsugu                      | Leann Tilley         | Richard Vallee         |
| Michiko Suma                        | Ellen Tisdale        | Koen van den Dries     |
| Farhana Taher Sumya                 | Margaret Titus       | Jan van der Beek       |
| Murat Sunbul                        | Ajit Tiwari          | Martin van der Laan    |
| Carlos Suñe                         | Stan Tomavo          | Peter van Haastert     |
| Jack Sunter                         | Stanislas Tomavo     | Sven van IJzendoorn    |
| Uttam Surana                        | Nario Tomishige      | Christine Vande Velde  |
| Thomas Surrey                       | Robert Tomko         | Maria Vartiainen       |
| Daniel Suter                        | Michael Tomlinson    | Lidia Vasilieva        |
| Kuninori Suzuki                     | Sara Toral-Perez     | Sue Vaughan            |
| Mitsuaki Tabuchi                    | Duy Tran             | Ines Velazquez Quesada |
| Mitsuo Tagaya                       | Phong Tran           | Kristen Verhey         |
| Stephen Tait                        | Moritz Treeck        | Isabelle Vernos        |
| Jason Tanny                         | Vikas Trivedi        | Miguel Vidal           |
| Samir Taoudi                        | Matthias Trost       | Andrej Vilfan          |
| Satoshi Tashiro                     | Kathleen Trybus      | David Virshup          |
| Takashi Tatsuta                     | Billy Tsai           | Tevis Vitale           |
| Takashi Tatsuta                     | Feng-Chiao Tsai      | Vladimir Volkov        |
| Nekatrios Tavernarakis              | Pantelis Tsoulfas    | Patricia Wadsworth     |
| Gregory Taylor                      | Kenji Tsuji          | Claire Walczak         |
| David Teis                          | Pamela Tuma          | Derek Walsh            |
| Liesbet Temmerman                   | Emma Turner          | Daniel Waltenstorfer   |
| Ulrich Tepass                       | Alison Twelvetrees   | Nancy Walworth         |
| Rita Tewari                         | Jeffery Twiss        | Chunxin Wang           |
| Siddharthan Balachandar<br>Thendral | Masahiro Ueda        | Da-Zhi Wang            |
| Manuel Thery                        | Anindita Ukil        | Fen Wang               |
| Eric Theveneau                      | Christian Ungermann  | Hongyin Wang           |
| Sven Thoms                          | Praveesh V           | Jennifer Wang          |
| Curtis Thorne                       | Paola Vagnarelli     | Juan Wang              |
| Teresa Thurston                     | William Vainschenker | Diane Ward             |
| Glen Tibbits                        | Ulrich Valcourt      | Michael Ward           |
| Ritva Tikkanen                      | Raphael Valdivia     | Derek Warren           |
| Paul Tillberg                       | Stella Valenzuela    | Kishore Wary           |

|                        |                    |
|------------------------|--------------------|
| Naoki Watanabe         | Kenneth Yamada     |
| Mark Waugh             | Harutake Yamazaki  |
| Valerie Weaver         | Shan Yan           |
| Bernhard Wehrle-Haller | Xiumin Yan         |
| Cornelis Weijer        | Jing Yang          |
| Jason Weinstein        | Tingting Yang      |
| Allan Weissman         | Guang Yao          |
| Julie Welburn          | Tso-Pang Yao       |
| Michael Welsh          | Jonathan Yewdell   |
| Michael Werner         | Shigenobu Yonemura |
| Gary Wessel            | Yisang Yoon        |
| Jukka Westermarck      | Richard Youle      |
| Chris Westlake         | Paul Young         |
| Dawn Wetzel            | Cheng-Han Yu       |
| Michael Whitaker       | Qigui Yu           |
| Sara Wickstrom         | Nadège Zanou       |
| Nils Wiedemann         | Ricardo Zayas      |
| Christopher Wilkinson  | Quira Zeidan       |
| Alaina Willet          | An Zeng            |
| Robin Williams         | Jing Zhang         |
| Chad Williamson        | Jing Zhang         |
| Ralph Witzgall         | Lin Zhang          |
| Patrick Woida          | Nianshu Zhang      |
| Ian Wong               | Xiang Zhang        |
| Philip Woodman         | Ying Zhang         |
| Chi Chung Wu           | Zhibing Zhang      |
| Congying Wu            | Jun Zhou           |
| Min Wu                 | Pengcheng Zhou     |
| Mingfu Wu              | Xueliang Zhu       |
| Xin Xiang              | Sophie Zinn-Justin |
| Zhiping Xie            | Henry Zivkovic     |
| Biyang Xu              | Michael Zuccaro    |
| Ren Xu                 | Naama Zung         |
